# Supplementary material
Source: MDPI journal article supplement (https://www.mdpi.com/2077-0472/12/7/1036)
Supplement: s1 [file s1]

Table S1. Correlation analysis between gross nitrification (GN), denitrification (DN) and soil physical and chemical properties in the enclosure (CK) treatment.

|                                 | GN      | DN     | NH <sub>4</sub> <sup>+</sup> -N | NO <sub>3</sub> <sup>-</sup> -N | IN      | SOC     | TN     | C/N    | BD      | pH     | SM     | ST |
|---------------------------------|---------|--------|---------------------------------|---------------------------------|---------|---------|--------|--------|---------|--------|--------|----|
| GN                              | 1       |        |                                 |                                 |         |         |        |        |         |        |        |    |
| DN                              | 0.827** | 1      |                                 |                                 |         |         |        |        |         |        |        |    |
| NH <sub>4</sub> <sup>+</sup> -N | 0.463*  | 0.445* | 1                               |                                 |         |         |        |        |         |        |        |    |
| NO <sub>3</sub> <sup>-</sup> -N | 0.523** | -0.241 | -0.177                          | 1                               |         |         |        |        |         |        |        |    |
| IN                              | -0.455* | -0.171 | -0.015                          | 0.987**                         | 1       |         |        |        |         |        |        |    |
| SOC                             | -0.251  | -0.344 | -0.38                           | -0.189                          | -0.255  | 1       |        |        |         |        |        |    |
| TN                              | -0.151  | -0.234 | -0.383*                         | 0.013                           | -0.05   | 0.789** | 1      |        |         |        |        |    |
| C/N                             | -0.204  | -0.23  | -0.083                          | -0.319                          | -0.337  | 0.482*  | -0.157 | 1      |         |        |        |    |
| BD                              | 0.143   | 0.12   | -0.154                          | -0.063                          | -0.089  | -0.075  | 0.042  | -0.192 | 1       |        |        |    |
| pH                              | -0.164  | -0.222 | -0.289                          | -0.114                          | -0.163  | -0.115  | -0.25  | 0.184  | -0.055  | 1      |        |    |
| SM                              | 0.427*  | 0.227  | 0.508**                         | -0.29                           | -0.211  | 0.07    | 0.002  | 0.105  | -0.432* | -0.281 | 1      |    |
| ST                              | 0.216   | 0.049  | -0.229                          | -0.461*                         | 0.506** | -0.09   | -0.13  | 0.042  | 0.627** | 0.392* | 0.436* | 1  |

GN: gross nitrification; DN: denitrification; IN: inorganic nitrogen; SOC: soil organic carbon; TN: total nitrogen; C/N: SOC/TN; BD: bulk density; SM: soil moisture; ST: soil temperature.

Table S2. Correlation analysis between gross nitrification (GN), denitrification (DN) and soil physical and chemical properties in the heavy grazing (G) treatment.

|                                 | GN      | DN     | NH <sub>4</sub> <sup>+</sup> -N | NO <sub>3</sub> <sup>-</sup> -N | IN     | SOC     | TN     | C/N   | BD     | pH     | SM    | ST |
|---------------------------------|---------|--------|---------------------------------|---------------------------------|--------|---------|--------|-------|--------|--------|-------|----|
| GN                              | 1       |        |                                 |                                 |        |         |        |       |        |        |       |    |
| DN                              | 0.770** | 1      |                                 |                                 |        |         |        |       |        |        |       |    |
| NH <sub>4</sub> <sup>+</sup> -N | 0.498** | -0.262 | 1                               |                                 |        |         |        |       |        |        |       |    |
| NO <sub>3</sub> <sup>-</sup> -N | 0.022   | 0.071  | -0.292                          | 1                               |        |         |        |       |        |        |       |    |
| IN                              | -0.052  | 0.034  | -0.151                          | 0.989**                         | 1      |         |        |       |        |        |       |    |
| SOC                             | -0.373  | 0.409* | 0.17                            | 0.014                           | 0.04   | 1       |        |       |        |        |       |    |
| TN                              | -0.216  | -0.239 | -0.078                          | 0.246                           | 0.242  | 0.888** | 1      |       |        |        |       |    |
| C/N                             | -0.395* | 0.413* | 0.534**                         | -0.466*                         | 0.401* | 0.301   | -0.169 | 1     |        |        |       |    |
| BD                              | -0.116  | -0.231 | -0.071                          | 0.004                           | -0.007 | 0.084   | 0.041  | 0.123 | 1      |        |       |    |
| pH                              | -0.383* | -0.335 | 0.197                           | 0.496**                         | 0.483* | 0.13    | 0.002  | 0.29  | 0.002  | 1      |       |    |
| SM                              | 0.551** | 0.372  | -0.033                          | -0.11                           | -0.119 | -0.138  | -0.19  | 0.053 | -0.325 | -0.363 | 1     |    |
| ST                              | 0.271   | -0.091 | -0.424*                         | -0.219                          | -0.29  | -0.212  | -0.214 | 0.001 | 0.483* | 0.23   | -0.23 | 1  |

GN: gross nitrification; DN: denitrification; IN: inorganic nitrogen; SOC: soil organic carbon; TN: total nitrogen; C/N: SOC/TN; BD: bulk density; SM: soil moisture; ST: soil temperature.

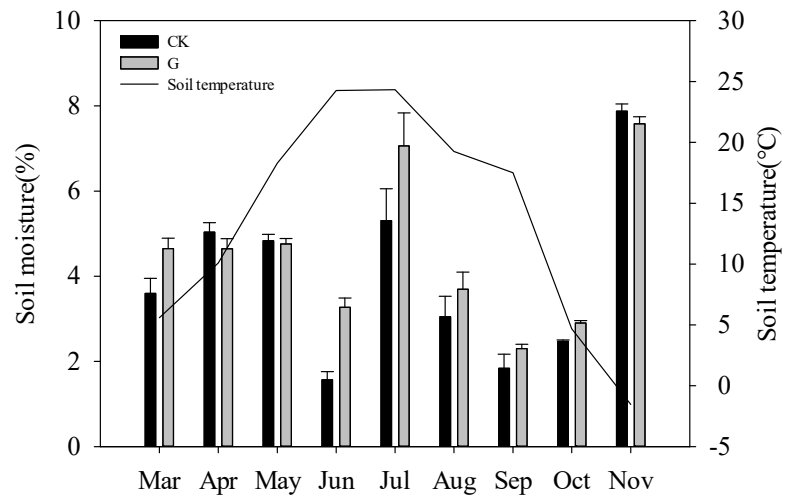

Figure S1. Monthly dynamics of surface soil temperature and moisture in the experimental plot.

CK: enclosure; G: heavy grazing.
